# Supplementary material for: Candidate Genes Associated with Delayed Neuropsychomotor Development and Seizures in a Patient with Ring Chromosome 20
Source: Case Rep Genet. 2020 Jan 21;2020:5957415. doi: 10.1155/2020/5957415 (PMC6995492; doi:10.1155/2020/5957415)
Supplement: Supplementary Materials — Table 1: list of GO terms identified by BiNGO in Cluster 1. Table 2: list of GO terms identified by BiNGO in Cluster 2. Table 3: list of GO terms identified by BiNGO in Cluster 3. Table 4: list of GO terms identified by BiNGO in Cluster 4. Table 5: list of GO terms identified by BiNGO in Cluster 5. Table 6: list of GO terms identified by BiNGO in Cluster 6. Table 7: list of GO terms identified by BiNGO in Cluster 7. Table 8: list of GO terms identified by BiNGO in Cluster 8. Table 9: list of GO terms identified by BiNGO in Cluster 9. Table 10: list of GO terms identified by BiNGO in Cluster 10. Table 11: list of GO terms identified by BiNGO in Cluster 11. Table 12: list of genes located in the 0.9 Mb smallest overlap region encompassing band 20q13.33. [file 5957415.f1.xlsx]

## Sheet: S-Table 1
S-table 1: List of Go terms identified by BiNGO in the Cluster 1.
Selected statistical test : Hypergeometric test
Selected correction : Benjamini & Hochberg False Discovery Rate (FDR) correction
Selected significance level : 0.05
No annotations were retrieved for the following entities:
DCTN6 PHLPP2 PTCD3 DCTN5 DCTN4 KLC1 GNB2L1 KLC4 KLC3 FCHO1 POTEI POTEJ FCHO2 POTEE POTEF REPS1
GO-ID	p-value	corr p-value	x	n	X	Description	Genes in test set
7018	9.3373e-42	1.2829e-38	38	110	176	microtubule-based movement	DYNC1I2|KIF12|KIF11|KIF15|KLC2|KIF19|KIF3B|KIF3A|KIF5B|KIF5A|KIF13B|KIF1C|KIF21A|KIF1B|KIF21B|KIF3C|KIF1A|DYNC1I1|DYNC2H1|DYNC1H1|KIF25|KIF23|KIF22|KIF6|KIF27|CENPE|KIF18A|KIF18B|KIFC2|KIF2A|KIF16B|KIF4B|KIF4A|KIF26B|KIF2C|KIF20A|KIF2B|KIF20B
6890	6.2343e-21	6.1185e-19	15	21	176	retrograde vesicle-mediated transport, Golgi to ER	COPB2|COPA|ARF1|COG7|COG4|COPB1|COG3|GBF1|ARFGAP1|COPZ1|ARCN1|KIF1C|COPG2|COPG1|COPE
48200	6.1536e-16	3.8432e-14	10	10	176	Golgi transport vesicle coating	COPB2|COPA|ARF1|COPB1|GBF1|COPG1|COPE|ARFGAP1|COPZ1|ARCN1
48205	6.1536e-16	3.8432e-14	10	10	176	COPI coating of Golgi vesicle	COPB2|COPA|ARF1|COPB1|GBF1|COPG1|COPE|ARFGAP1|COPZ1|ARCN1
6891	4.961e-13	2.6217e-11	11	19	176	intra-Golgi vesicle-mediated transport	NAPA|COPB2|COG5|COPB1|COG3|COG2|COG1|COPG2|COPE|COPZ1|NAPG
16044	2.2892e-10	9.8292e-09	28	382	176	cellular membrane organization	ITSN2|NAPA|COPB2|COPA|ARF1|COPB1|ITSN1|CLTC|USO1|CLTA|AP2A1|AP2A2|NAPG|CASP3|CLTCL1|AP2S1|NRCAM|HRAS|EPS15|GBF1|ARFGAP1|COPZ1|ARCN1|NECAP2|NECAP1|COPG1|FOLR1|COPE
87	8.7166e-06	0.00032369	18	239	176	M phase of mitotic cell cycle	DCTN2|DCTN1|CLTC|DCTN3|KIF25|KIF23|KIF11|KIF22|AURKB|KIF15|AURKA|CENPE|KIF18A|KIF2A|CLTCL1|KIF2C|KIF2B|KIF20B
Legends
x: number of proteins presentes in the network that were assigned for a given GO;
n: number of all proteins identified so far for a given GO annotation;
X: number of proteins present in the cluster.
Processes related to hormone biosynthesis and signaling pathway
Processes related to vesicles, movement and control of the cell cycle
Processes related to neuronal development and function
Processes related to organization and DNA repair
Processes related to ion transport

## Sheet: S-Table 2
S-table 2: List of Go terms identified by BiNGO in the Cluster 2.
Selected statistical test : Hypergeometric test
Selected correction : Benjamini & Hochberg False Discovery Rate (FDR) correction
Selected significance level : 0.05
No annotations were retrieved for the following entities:
WDR3 ZCCHC17 RPS4XP21 REXO1L11P GLIPR1 RPSAP58 POTEI POTEJ PABPC4L POTEE POTEF RRP12 NUDT12 NCOA1 WDHD1 REXO1 COL25A1 COL23A1 PABPC5 WDR31 REXO1L10P GORASP2 ANKRD42 ANKS6 COL4A5 PPP1R42 MASK-BP3 TGOLN2 HELZ2 FCHO1 UBB REXO1L1 FCHO2 UBC PABPC1L2B PABPC1L2A REPS1 PTCD3 YTHDF1 COL22A1 PALB2 ENSG00000267699 SCAF4 ANKHD1 GNB2L1 LOC81691 KIAA1432 ENSG00000232856 NOL10 PABPC1L ENSG00000259753
GO-ID	p-value	corr p-value	x	n	X	Description	Genes in test set
7229	5.3735e-16	5.7083e-14	23	57	460	integrin-mediated signaling pathway	ITGB1|COL16A1|ITGB5|ITGA4|ITGB4|ITGA3|ITGA2|ITGA2B|ITGA1|PTK2|CTGF|COL3A1|ITGA10|ITGA11|ITGA8|ITGB8|ITGA7|ITGB7|ITGAV|ITGA6|ITGB6|ITGA5|ITGA9
30521	2.173e-14	2.0696e-12	19	40	460	androgen receptor signaling pathway	MED1|NCOA2|NCOA3|FHL2|BRCA1|MED4|MED16|RHOA|MED17|MED12|MED14|CDK7|MED13|MED24|MED30|KAT5|CCNE1|PPARGC1A|RAN
7160	1.2407e-12	1.0709e-10	24	85	460	cell-matrix adhesion	COL17A1|ITGB1|COL13A1|ITGB5|ITGB4|ITGA3|ITGA2|ITGA2B|ITGA1|AGT|RHOA|CTGF|COL3A1|ITGA10|COL5A3|ITGA11|ITGA8|ITGB8|ITGA7|ITGB7|ITGAV|ITGA6|ITGB6|CD44
30518	1.7574e-11	1.3119e-09	20	61	460	steroid hormone receptor signaling pathway	MED1|NCOA2|NCOA6|NCOA3|FHL2|BRCA1|MED4|MED16|RHOA|MED17|MED12|MED14|CDK7|MED13|MED24|MED30|KAT5|CCNE1|PPARGC1A|RAN
42254	6.785e-10	4.3582e-08	26	131	460	ribosome biogenesis	RPL5|RPLP0|HEATR1|ISG20L2|RPS15|EXOSC7|RPL7A|EXOSC6|EXOSC5|EXOSC10|RPS16|EXOSC4|RPS19|EXOSC9|EXOSC8|RRS1|UTP20|EXOSC3|EXOSC2|EXOSC1|RPS7|RPS6|RPS25|TBL3|C1D|RPS24
6281	9.097e-08	5.0252e-06	36	300	460	DNA repair	BLM|BRCA1|BRCA2|RAD51AP1|WRN|BRIP1|KAT5|EXO1|POLD1|RBBP8|NBN|BARD1|MED1|UPF1|FANCM|NCOA6|XRCC2|XRCC3|MRE11A|GTF2H1|GTF2H2|GTF2H3|GTF2H4|GTF2H5|RAD51B|CDK7|RAD50|SFPQ|RAD51|RAD51C|ERCC3|ERCC2|MMS19|ATM|DNA2|MNAT1
30199	1.2081e-07	6.4171e-06	12	27	460	collagen fibril organization	COL1A1|COL3A1|COL1A2|COL2A1|P4HA1|COL5A1|COL14A1|COL11A1|COL5A3|COL12A1|COL5A2|SERPINH1
Legends
x: number of proteins presentes in the network that were assigned for a given GO;
n: number of all proteins identified so far for a given GO annotation;
X: number of proteins present in the cluster.
Processes related to hormone biosynthesis and signaling pathway
Processes related to vesicles, movement and control of the cell cycle
Processes related to neuronal development and function
Processes related to organization and DNA repair
Processes related to ion transport

## Sheet: S-Table 3
S-table 3: List of Go terms identified by BiNGO in the Cluster 3.
Selected statistical test : Hypergeometric test
Selected correction : Benjamini & Hochberg False Discovery Rate (FDR) correction
Selected significance level : 0.05
No annotations were retrieved for the following entities:
TGOLN2 VPS51 KIAA1432 LSMD1 GOLGA1 GCC1
GO-ID	p-value	corr p-value	x	n	X	Description	Genes in test set
16192	4.5556e-19	7.3073e-17	25	590	46	vesicle-mediated transport	NAPA|NAPB|STX16|ARL1|GCC2|AP2A2|NAPG|GOLGA4|VTI1A|STX6|VPS54|STXBP5|RAB6A|RAB6B|NSF|COG7|COG5|COG4|COG3|COG2|COG1|NECAP1|ELMO1|VAMP4|DOCK1
48193	1.5151e-12	1.4798e-10	13	132	46	Golgi vesicle transport	NAPA|COG7|COG5|STX16|COG4|COG3|COG2|ARL1|COG1|GCC2|NAPG|STX6|RAB6B
6891	1.0802e-09	6.33e-08	7	19	46	intra-Golgi vesicle-mediated transport	NAPA|COG5|STX16|COG3|COG2|COG1|NAPG
Legends
x: number of proteins presentes in the network that were assigned for a given GO;
n: number of all proteins identified so far for a given GO annotation;
X: number of proteins present in the cluster.
Processes related to hormone biosynthesis and signaling pathway
Processes related to vesicles, movement and control of the cell cycle
Processes related to neuronal development and function
Processes related to organization and DNA repair
Processes related to ion transport

## Sheet: S-Table 4
S-table 4: List of Go terms identified by BiNGO in the Cluster 4.
Selected statistical test : Hypergeometric test
Selected correction : Benjamini & Hochberg False Discovery Rate (FDR) correction
Selected significance level : 0.05
No annotations were retrieved for the following entities:
WDR3 ZCCHC17 REXO1L11P NUBP2 ENSG00000228049 POTEI POTEJ REXO1L1 PABPC4L POTEE UBXN7 POTEF PABPC1L2B RRP12 PABPC1L2A WDHD1 REXO1 PABPC5 REXO1L10P ENSG00000267699 PALB2 LOC81691 PPP1R42 NOL10 PABPC1L
GO-ID	p-value	corr p-value	x	n	X	Description	Genes in test set
6368	7.9948e-24	5.8185e-22	20	48	149	RNA elongation from RNA polymerase II promoter	GTF2A2|GTF2B|GTF2H1|GTF2H2|GTF2H3|GTF2F2|GTF2E1|GTF2H4|GTF2E2|CDK7|POLR2A|ERCC3|POLR2B|POLR2D|ERCC2|POLR2E|POLR2F|POLR2G|MNAT1|TAF1
6281	4.387e-23	3.0247e-21	35	300	149	DNA repair	BLM|RTEL1|GTF2H2C|BRCA1|BRCA2|RAD51AP1|BRIP1|WRN|KAT5|EXO1|POLD1|RBBP8|NBN|BARD1|FANCM|NCOA6|XRCC2|XRCC3|MRE11A|GTF2H1|GTF2H2|GTF2H3|GTF2H4|GTF2H5|RAD51B|CDK7|RAD50|RAD51C|RAD51|ERCC3|ERCC2|MMS19|ATM|DNA2|MNAT1
33554	2.7826e-16	1.257e-14	39	619	149	cellular response to stress	BLM|RTEL1|GTF2H2C|EPAS1|BRCA1|BRCA2|HIF1A|RAD51AP1|BRIP1|WRN|KAT5|EXO1|POLD1|RBBP8|NBN|BARD1|FANCM|NCOA6|XRCC2|XRCC3|MRE11A|AEN|GTF2H1|GTF2H2|GTF2H3|GTF2H4|GTF2H5|RAD51B|CDK7|RAD50|RAD51C|RAD51|ERCC3|ERCC2|MMS19|ATM|DNA2|MNAT1|TAF1
6310	1.2093e-10	4.9507e-09	16	105	149	DNA recombination	BLM|NCOA6|XRCC2|XRCC3|MRE11A|BRCA1|BRCA2|RAD51AP1|RAD51B|WRN|RAD50|RAD51C|RAD51|EXO1|ATM|NBN
6289	4.9568e-09	1.8553e-07	12	57	149	nucleotide-excision repair	CDK7|ERCC3|POLD1|ERCC2|MMS19|GTF2H1|GTF2H2|MNAT1|BRCA2|GTF2H3|GTF2H4|GTF2H5
6364	1.2788e-08	4.6535e-07	14	97	149	rRNA processing	HEATR1|EXOSC7|EXOSC6|TBL3|EXOSC5|EXOSC10|EXOSC4|EXOSC9|C1D|EXOSC8|UTP20|EXOSC3|EXOSC2|EXOSC1
34470	1.3695e-08	4.8487e-07	18	192	149	ncRNA processing	ELAC2|ELAC1|HEATR1|TRNT1|DICER1|EXOSC7|EXOSC6|TBL3|EXOSC5|EXOSC10|EXOSC4|EXOSC9|C1D|EXOSC8|UTP20|EXOSC3|EXOSC2|EXOSC1
6302	2.9015e-07	7.9187e-06	11	61	149	double-strand break repair	RAD51AP1|BLM|BRIP1|RAD50|RAD51|KAT5|XRCC2|MRE11A|NBN|BRCA1|BRCA2
32508	5.2569e-06	0.00012753	7	19	149	DNA duplex unwinding	TOP3B|RAD50|RAD51|ERCC3|TOP3A|MRE11A|NBN
51327	6.3442e-06	0.00014841	12	102	149	M phase of meiotic cell cycle	RAD51B|RAD50|RAD51C|RAD51|EXO1|XRCC2|TOP3A|MRE11A|ATM|TAF1L|NBN|BRCA2
Legends
x: number of proteins presentes in the network that were assigned for a given GO;
n: number of all proteins identified so far for a given GO annotation;
X: number of proteins present in the cluster.
Processes related to hormone biosynthesis and signaling pathway
Processes related to vesicles, movement and control of the cell cycle
Processes related to neuronal development and function
Processes related to organization and DNA repair
Processes related to ion transport

## Sheet: S-Table 5
S-table 5: List of Go terms identified by BiNGO in the Cluster 5.
Selected statistical test : Hypergeometric test
Selected correction : Benjamini & Hochberg False Discovery Rate (FDR) correction
Selected significance level : 0.05
No annotations were retrieved for the following entities:
GO-ID	p-value	corr p-value	x	n	X	Description	Genes in test set
7271	1.7065e-19	1.0751e-16	9	17	18	synaptic transmission, cholinergic	CHRNB2|CHRNB1|CHRNA3|CHRNB4|CHRNB3|CHRNA4|CHRNA7|CHRNE|CHRNA10
35095	1.3104e-17	4.1278e-15	7	7	18	behavioral response to nicotine	CHRNB2|CHRNB1|CHRNA3|CHRNB4|CHRNA5|CHRNA4|CHRNA7
35094	6.5497e-13	5.1579e-11	7	19	18	response to nicotine	CHRNB2|CHRNB1|CHRNA3|CHRNB4|CHRNA5|CHRNA4|CHRNA7
42391	1.3016e-12	9.1113e-11	10	132	18	regulation of membrane potential	CHRNB2|CHRNA1|CHRNB1|CHRND|CHRNA3|CHRNB4|CHRNG|CHRNA4|CHRNA7|CHRNA6
19226	4.7016e-12	2.6927e-10	12	342	18	transmission of nerve impulse	CHRNB2|CHRNA1|CHRNB1|CHRNA3|CHRNB4|CHRNB3|CHRNA5|CHRNA4|CHRNA7|CHRNE|CHRNA6|CHRNA10
43279	2.2484e-09	8.8529e-08	7	54	18	response to alkaloid	CHRNB2|CHRNB1|CHRNA3|CHRNB4|CHRNA5|CHRNA4|CHRNA7
30534	2.7345e-08	8.2036e-07	7	76	18	adult behavior	CHRNB2|CHRNB1|CHRNA3|CHRNB4|CHRNA5|CHRNA4|CHRNA7
7274	5.119e-08	1.4659e-06	5	15	18	neuromuscular synaptic transmission	CHRNB2|CHRNA1|CHRNB1|CHRNA3|CHRNB4
51952	8.4083e-06	0.00018919	5	38	18	regulation of amine transport	CHRNB2|CHRNA3|CHRNA4|CHRNA7|CHRNA6
60084	1.6729e-05	0.00035131	3	3	18	synaptic transmission involved in micturition	CHRNB2|CHRNA3|CHRNB4
Legends
x: number of proteins presentes in the network that were assigned for a given GO;
n: number of all proteins identified so far for a given GO annotation;
X: number of proteins present in the cluster.
Processes related to hormone biosynthesis and signaling pathway
Processes related to vesicles, movement and control of the cell cycle
Processes related to neuronal development and function
Processes related to organization and DNA repair
Processes related to ion transport

## Sheet: S-Table 6
S-table 6: List of Go terms identified by BiNGO in the Cluster 6.
Selected statistical test : Hypergeometric test
Selected correction : Benjamini & Hochberg False Discovery Rate (FDR) correction
Selected significance level : 0.05
No annotations were retrieved for the following entities:
ENSG00000228049 REXO1 UBXN7 NOL10 RRP12 ENSG00000267699 SCAF4 NUBP2
GO-ID	p-value	corr p-value	x	n	X	Description	Genes in test set
6367	5.6944e-26	3.2064e-24	20	67	82	transcription initiation from RNA polymerase II promoter	GTF2A2|NCOA6|GTF2B|GTF2H1|GTF2H2|GTF2H3|GTF2F2|GTF2E1|GTF2H4|GTF2E2|CDK7|POLR2A|ERCC3|POLR2D|ERCC2|POLR2E|POLR2F|POLR2G|MNAT1|TAF1
43933	1.4869e-10	4.0312e-09	26	724	82	macromolecular complex subunit organization	GTF2A2|GTF2B|TAF1L|GTF2E1|GTF2E2|POLR2A|TGS1|POLR2D|POLR2E|POLR2F|POLR2G|BRF2|BRF1|NCOA6|GTF2H1|DICER1|GTF2H2|GTF2H3|GTF2F2|GTF2H4|CDK7|HIST2H3A|ERCC3|ERCC2|MNAT1|TAF1
6289	7.5682e-09	1.9103e-07	10	57	82	nucleotide-excision repair	CDK7|ERCC3|ERCC2|GTF2H1|MMS19|GTF2H2|GTF2H3|MNAT1|GTF2H4|GTF2H5
Legends
x: number of proteins presentes in the network that were assigned for a given GO;
n: number of all proteins identified so far for a given GO annotation;
X: number of proteins present in the cluster.
Processes related to hormone biosynthesis and signaling pathway
Processes related to vesicles, movement and control of the cell cycle
Processes related to neuronal development and function
Processes related to organization and DNA repair
Processes related to ion transport

## Sheet: S-Table 7
S-table 7: List of Go terms identified by BiNGO in the Cluster 7.
Selected statistical test : Hypergeometric test
Selected correction : Benjamini & Hochberg False Discovery Rate (FDR) correction
Selected significance level : 0.05
No annotations were retrieved for the following entities:
FCHO1 FCHO2 REPS1
GO-ID	p-value	corr p-value	x	n	X	Description	Genes in test set
16192	2.5696e-11	2.5413e-08	18	590	39	vesicle-mediated transport	ITSN2|SGIP1|ITSN1|CLTC|CLTB|CLTA|AP2A1|AP2B1|AP2A2|NECAP2|GGA3|NECAP1|CLTCL1|AP2S1|EPS15|HRAS|AP2M1|ARF6
7169	9.6916e-08	1.5865e-05	11	219	39	transmembrane receptor protein tyrosine kinase signaling pathway	ERBB3|EGF|PXN|ERBB2|STAT3|PDGFB|CBL|JAK2|EPS15|EGFR|BCAR1
10324	2.8389e-06	0.00020055	10	222	39	membrane invagination	ITSN2|NECAP2|NECAP1|ITSN1|CLTC|CLTCL1|CLTA|AP2A1|AP2A2|HRAS
6897	2.8389e-06	0.00020055	10	222	39	endocytosis	ITSN2|NECAP2|NECAP1|ITSN1|CLTC|CLTCL1|CLTA|AP2A1|AP2A2|HRAS
Legends
x: number of proteins presentes in the network that were assigned for a given GO;
n: number of all proteins identified so far for a given GO annotation;
X: number of proteins present in the cluster.
Processes related to hormone biosynthesis and signaling pathway
Processes related to vesicles, movement and control of the cell cycle
Processes related to neuronal development and function
Processes related to organization and DNA repair
Processes related to ion transport

## Sheet: S-Table 8
S-table 8: List of Go terms identified by BiNGO in the Cluster 8.
Selected statistical test : Hypergeometric test
Selected correction : Benjamini & Hochberg False Discovery Rate (FDR) correction
Selected significance level : 0.05
No annotations were retrieved for the following entities:
LRGUK GLIPR1 ENSG00000228049 POTEI POTEJ GID8 POTEE UBXN7 POTEF ANKHD1 NUBP2
GO-ID	p-value	corr p-value	x	n	X	Description	Genes in test set
718	6.1115e-08	4.2424e-06	8	21	128	nucleotide-excision repair, DNA damage removal	CDK7|ERCC3|ERCC2|GTF2H1|GTF2H2|MNAT1|GTF2H3|GTF2H4
19216	1.2855e-07	8.2373e-06	14	133	128	regulation of lipid metabolic process	SLC27A1|CPT1A|ACSL1|APOA2|APOA1|ACACB|APOA5|CYP7A1|AGT|FABP1|CPT2|TRIB3|PPARA|UGT1A9
6289	7.0175e-07	3.897e-05	10	57	128	nucleotide-excision repair	CDK7|ERCC3|ERCC2|MMS19|GTF2H1|GTF2H2|MNAT1|GTF2H3|GTF2H4|GTF2H5
19217	1.0057e-06	5.4049e-05	10	59	128	regulation of fatty acid metabolic process	FABP1|CPT1A|CPT2|ACSL1|TRIB3|PPARA|UGT1A9|ACACB|APOA5|AGT
10565	1.3682e-06	7.1233e-05	11	81	128	regulation of cellular ketone metabolic process	FABP1|CPT1A|CPT2|ACSL1|TRIB3|PPARA|UGT1A9|ACACB|APOA5|CYP7A1|AGT
Legends
x: number of proteins presentes in the network that were assigned for a given GO;
n: number of all proteins identified so far for a given GO annotation;
X: number of proteins present in the cluster.
Processes related to hormone biosynthesis and signaling pathway
Processes related to vesicles, movement and control of the cell cycle
Processes related to neuronal development and function
Processes related to organization and DNA repair
Processes related to ion transport

## Sheet: S-Table 9
S-table 9: List of Go terms identified by BiNGO in the Cluster 9.
Selected statistical test : Hypergeometric test
Selected correction : Benjamini & Hochberg False Discovery Rate (FDR) correction
Selected significance level : 0.05
No annotations were retrieved for the following entities:
PHLPP2 LRGUK PPTC7 PPM1N NUBP2 PP2D1 POTEI NRG4 POTEJ ANKRD42 POTEE POTEF STAP2
GO-ID	p-value	corr p-value	x	n	X	Description	Genes in test set
6470	5.0716e-08	5.0429e-05	12	132	77	protein amino acid dephosphorylation	PDP1|PPM1A|PTPN1|PPM1B|PDP2|PPM1L|PPM1K|PPM1D|PPM1E|PPM1F|ILKAP|PPM1G
7169	1.378e-06	0.00032336	13	219	77	transmembrane receptor protein tyrosine kinase signaling pathway	EGF|STAT3|NRG1|EGFR|EREG|DOK1|ERBB3|ERBB2|AKT1|JAK2|BCAR1|HBEGF|FGFR1
Legends
x: number of proteins presentes in the network that were assigned for a given GO;
n: number of all proteins identified so far for a given GO annotation;
X: number of proteins present in the cluster.
Processes related to hormone biosynthesis and signaling pathway
Processes related to vesicles, movement and control of the cell cycle
Processes related to neuronal development and function
Processes related to organization and DNA repair
Processes related to ion transport

## Sheet: S-Table 10
S-table 10: List of Go terms identified by BiNGO in the Cluster 10.
Selected statistical test : Hypergeometric test
Selected correction : Benjamini & Hochberg False Discovery Rate (FDR) correction
Selected significance level : 0.05
No annotations were retrieved for the following entities:
NUDT12
GO-ID	p-value	corr p-value	x	n	X	Description	Genes in test set
6334	1.7245e-29	8.4329e-27	20	93	43	nucleosome assembly	HIST1H3J|H3F3B|H2AFY|H3F3C|H3F3A|CENPA|HIST1H3A|HIST2H3A|H2AFY2|HIST3H3|HIST1H3F|HIST1H3G|HIST1H3H|HIST1H3I|HIST1H3B|HIST2H3D|HIST1H3C|HIST2H3C|HIST1H3D|HIST1H3E
6323	1.838e-26	1.498e-24	20	128	43	DNA packaging	HIST1H3J|H3F3B|H2AFY|H3F3C|H3F3A|CENPA|HIST1H3A|HIST2H3A|H2AFY2|HIST3H3|HIST1H3F|HIST1H3G|HIST1H3H|HIST1H3I|HIST1H3B|HIST2H3D|HIST1H3C|HIST2H3C|HIST1H3D|HIST1H3E
51276	4.8342e-26	3.3771e-24	28	535	43	chromosome organization	HIST1H3J|EHMT2|ASH2L|CENPA|HIST1H3A|RBBP5|RRS1|HIST1H3F|HIST1H3G|HIST1H3H|HIST1H3I|HIST1H3B|HIST1H3C|HIST1H3D|HIST1H3E|BRD1|H3F3B|H2AFY|H3F3C|SETD1B|H3F3A|SETD1A|HIST2H3A|H2AFY2|WDR82|HIST3H3|HIST2H3D|HIST2H3C
6333	7.8625e-26	4.806e-24	20	137	43	chromatin assembly or disassembly	HIST1H3J|H3F3B|H2AFY|H3F3C|H3F3A|CENPA|HIST1H3A|HIST2H3A|H2AFY2|HIST3H3|HIST1H3F|HIST1H3G|HIST1H3H|HIST1H3I|HIST1H3B|HIST2H3D|HIST1H3C|HIST2H3C|HIST1H3D|HIST1H3E
71103	4.6801e-25	2.5429e-23	20	149	43	DNA conformation change	HIST1H3J|H3F3B|H2AFY|H3F3C|H3F3A|CENPA|HIST1H3A|HIST2H3A|H2AFY2|HIST3H3|HIST1H3F|HIST1H3G|HIST1H3H|HIST1H3I|HIST1H3B|HIST2H3D|HIST1H3C|HIST2H3C|HIST1H3D|HIST1H3E
Legends
x: number of proteins presentes in the network that were assigned for a given GO;
n: number of all proteins identified so far for a given GO annotation;
X: number of proteins present in the cluster.
Processes related to hormone biosynthesis and signaling pathway
Processes related to vesicles, movement and control of the cell cycle
Processes related to neuronal development and function
Processes related to organization and DNA repair
Processes related to ion transport

[truncated: 2 more sheets: S-Table 11, S-Table 12]
